# Supplementary material for: Enhanced Placental Mitochondrial Respiration in Tibetan Women at High Altitude
Source: Front Physiol. 2021 Jul 14;12:697022. doi: 10.3389/fphys.2021.697022 (PMC8317222; doi:10.3389/fphys.2021.697022)
Supplement: Supplementary file 13 [file Table_3.XLSX]

## Sheet: Sheet1
3.24B-ACTIN						3.24 CV						CIII						CII						CIV
1	5237	80.995	6	203		1	4558	81.217	0	187		1	4412	92.002	3	182		1	5642	27.962	0	120		1	5110	31.045	0	151
2	4718	87.847	5	204		2	4215	60.223	0	192		2	3498	58.705	0	187		2	7128	19.815	0	106		2	4312	32.849	0	127
3	5348	68.71	1	207		3	4558	55.085	0	193		3	4705	32.289	0	190		3	4971	25.057	0	93		3	5088	25.333	0	124
4	6732	56.729	0	207		4	4376	62.221	0	190		4	4316	37.042	0	183		4	6108	16.893	0	73		4	6710	15.906	0	95
5	6158	53.188	0	208		5	4752	39.758	0	192		5	3732	34.925	0	177		5	5204	14.468	0	69		5	6498	12.487	0	57
6	5420	46.646	0	192		6	3968	34.724	0	137		6	4908	18.68	0	67		6	4752	17.857	0	73		6	6336	10.183	0	65
5.12	CS					CV						CIII						CII						CIV						CI
1	4462	51.276	1	174		1	4532	67.012	0	157		1	2948	46.556	1	148		1	4556	42.408	1	165		1	2888	12.069	0	62		1	4503	32.614	0	169
2	3610	68.786	2	161		2	4984	66.163	1	161		2	2659	41.002	0	105		2	3052	64.504	5	169		2	3022	22.039	0	99		2	3176	38.842	0	169
3	4558	61.504	0	168		3	6780	46.244	0	171		3	4215	24.698	0	134		3	4328	31.758	1	113		3	2572	13.559	0	42		3	2888	15.802	0	55
4	2560	84.33	4	174		4	4901	60.996	0	170		4	2632	30.294	0	78		4	5096	33.068	0	157		4	2418	14.402	0	65		4	3544	14.494	0	84
5	2758	85.62	4	170		5	4812	58.734	2	168		5	3368	22.175	0	73		5	4668	39.733	0	168		5	3503	8.789	0	45		5	5709	10.126	0	60
6	2572	66.092	1	180		6	4466	59.679	0	173		6	3470	34.885	1	168		6	4305	33.957	0	134		6	3512	7.074	0	39		6	5320	9.674	0	69
5.27 B-ACTIN						CV						CIII						CII						CIV						CI
1	6784	71.834	1	201		1	2964	107.979	11	197		1	1988	63.698	3	110		1	4466	41.435	0	145		1	2054	50.153	1	154		1	3075	22.734	0	109
2	6582	60.594	0	202		2	4558	61.663	0	195		2	2948	60.906	4	170		2	4668	48.576	0	193		2	2026	35.877	1	104		2	1588	14.856	0	38
3	5487	59.742	0	205		3	3512	79.454	0	200		3	2534	63.438	7	125		3	5348	44.502	0	153		3	3075	16.808	0	79		3	3312	14.375	0	51
4	4524	67.09	2	205		4	3585	93.845	5	205		4	2972	48.878	0	137		4	4466	33.034	0	112		4	2380	30.725	0	136		4	2972	19.796	0	136
5	5133	54.535	0	205		5	4177	74.816	0	209		5	3041	43.689	0	149		5	4779	37.742	0	169		5	3032	30.232	0	131		5	2972	11.537	0	69
6	5736	42.188	0	205		6	3182	81.628	0	208		6	2604	41.122	2	82		6	4948	27.643	0	111		6	3012	23.892	0	87		6	2413	15.282	0	42
5.27CS						CV						CIII						CII						CIV						CI
1	4611	64.23	0	191		1	4640	69.891	0	213		1	3498	12.719	0	64		1	3625	10.022	0	55		1	4145	11.096	0	88		1	2808	10.549	0	38
2	4524	56.889	1	193		2	4984	58.688	0	213		2	3968	27.331	0	98		2	4830	30.538	0	156		2	2972	28.195	0	120		2	4691	14.111	0	120
3	3977	84.993	0	196		3	4705	83.497	0	213		3	4449	38.011	0	140		3	6364	20.915	0	118		3	2575	37.321	0	125		3	3968	10.628	0	70
4	3182	89.44	1	197		4	4558	53.856	0	214		4	5237	19.326	0	139		4	7235	13.354	0	95		4	4145	10.733	0	50		4	3560	7.808	0	29
5	2972	89.065	2	196		5	5088	34.7	0	215		5	4202	12.188	0	55		5	4668	14.979	0	85		5	3702	6.641	0	28		5	3688	4.132	0	23
6	3844	61.743	2	200		6	6928	47.03	0	216		6	3030	15.397	0	52		6	5944	14.433	0	98		6	4296	5.652	0	29		6	4072	3.855	0	14

## Sheet: Sheet2
		3780Tibetan		2200Tibetan		2200Han			3780Tibetan		2200Tibetan		2200Han				3780Tibetan		2200Tibetan		2200Han			3780Tibetan		2200Tibetan		2200Han			3780Tibetan		2200Tibetan		2200Han
	b-actin1	80.995		68.71		53.188
		87.847		56.729		46.646
	CV	81.217		55.085		39.758		CIII	92.002		32.289		34.925			CII	27.962		25.057		14.468		CIV	31.045		25.333		12.487
		60.223		62.221		34.724			58.705		37.042		18.68				19.815		16.893		17.857			32.849		15.906		10.183
	CS
		51.276		61.504		85.62
		68.786		84.33		66.092
																							CIV	12.069		13.559		8.789		CI	32.614		15.802		10.126
	CV	67.012		46.244		58.734		CIII	46.556		24.698		22.175			CII	42.408		31.758		39.733			22.039		14.402		7.074			38.842		14.494		9.674
		66.163		60.996		59.679			41.002		30.294		34.885				64.504		33.068		33.957
	CV	107.979		79.454		74.816		CIII	63.698		63.438		43.689			CII	41.435		44.502		37.742		CIV	50.153		16.808		30.232		CI	22.734		14.375		11.537
		61.663		93.845		81.628			60.906		48.878		41.122				48.576		33.034		27.643			35.877		30.725		23.892			14.856		19.796		15.282
	B-actin1	71.834		59.742		54.535
		60.594		67.09		42.188
	CS	64.23		84.993		89.065
		56.889		89.44		61.743
	CV	69.891		83.497		34.7		CIII	12.719		38.011		12.188			CII	10.022		20.915		14.979		CIV	11.096		37.321		6.641		CI	10.549		10.628		4.132
		58.688		53.856		47.03			27.331		19.326		15.397				30.538		13.354		14.433			28.195		10.733		5.652			14.111		7.808		3.855

## Sheet: Sheet3
	3780Tibetan						2200Tibetan					2200Han
cs	b-actin		#VALUE!		cs		b-actin		#VALUE!		cs	b-actin		#VALUE!
51.276	80.995		0.633076		61.504		68.71		0.895124		85.62	53.188		1.60976
68.786	87.847		0.78302		84.33		56.729		1.48654		66.092	46.646		1.41688
69.891	71.834		0.972952		84.993		59.742		1.42267		89.065	54.535		1.63317
58.688	60.594		0.968545		89.44		67.09		1.33313		61.743	42.188		1.46352
			3780Tibetan											2200Tibetan															2200Han
CS	CV	#VALUE!	CIII	#VALUE!	CII	#VALUE!	CIV	#VALUE!	CI	#VALUE!		CS		CV	#VALUE!	CIII	#VALUE!	CII	#VALUE!	CIV	#VALUE!	CI	#VALUE!			CS	CV	#VALUE!	CIII	#VALUE!	CII	#VALUE!	CIV	#VALUE!	CI	#VALUE!
51.276	81.217	1.58392	92.002	1.79425	27.962	0.545323	31.045	0.605449	32.614	0.636048		61.504		55.085	0.895633	32.289	0.52499	25.057	0.407404	13.559	0.220457	15.802	0.256926			85.62	39.758	0.464354	34.925	0.407907	14.468	0.168979	12.487	0.145842		0
68.786	60.223	0.875512	58.705	0.853444	19.815	0.288067	32.849	0.477554	38.842	0.564679		84.33		62.221	0.737828	37.042	0.439251	16.893	0.20032	14.402	0.170781	14.494	0.171872			66.092	34.724	0.525389	18.68	0.282636	17.857	0.270184	10.183	0.154073		0
51.276	67.012	1.30689	46.556	0.907949	42.408	0.827054	12.069	0.235373		0		61.504		46.244	0.751886	24.698	0.401567	31.758	0.516357	25.333	0.411892		0			85.62	58.734	0.685985	22.175	0.258993	39.733	0.464062	8.789	0.102651	10.126	0.118267
68.786	66.163	0.961867	41.002	0.596081	64.504	0.937749	22.039	0.320399		0		84.33		60.996	0.723301	30.294	0.359232	33.068	0.392126	15.906	0.188616		0			66.092	59.679	0.902969	34.885	0.527825	33.957	0.513784	7.074	0.107033	9.674	0.146372
64.23	107.979	1.68113	63.698	0.991717	41.435	0.645104	50.153	0.780835	22.734	0.353947		84.993		79.454	0.93483	63.438	0.746391	44.502	0.523596	16.808	0.197757	14.375	0.169132			89.065	74.816	0.840016	43.689	0.490529	37.742	0.423758	30.232	0.339437	11.537	0.129535
56.889	61.663	1.08392	60.906	1.07061	48.576	0.853873	35.877	0.630649	14.856	0.26114		89.44		93.845	1.04925	48.878	0.546489	33.034	0.369343	30.725	0.343526	19.796	0.221333			61.743	81.628	1.32206	41.122	0.666019	27.643	0.447711	23.892	0.386959	15.282	0.24751
64.23	69.891	1.08814	12.719	0.198023	10.022	0.156033	11.096	0.172754	10.549	0.164238		84.993		83.497	0.982399	38.011	0.447225	20.915	0.246079	37.321	0.439107	10.628	0.125046			89.065	34.7	0.389603	12.188	0.136844	14.979	0.168181	6.641	0.0745635	4.132	0.0463931
56.889	58.688	1.03162	27.331	0.480427	30.538	0.5368	28.195	0.495614	14.111	0.248044		89.44		53.856	0.602147	19.326	0.216078	13.354	0.149307	10.733	0.120002	7.808	0.0872987			61.743	47.03	0.761706	15.397	0.249372	14.433	0.233759	5.652	0.0915407	3.855	0.0624362
